# Supplementary material for: Functionalization of Human Serum Albumin by Tyrosine Click
Source: Int J Mol Sci. 2021 Aug 12;22(16):8676. doi: 10.3390/ijms22168676 (PMC8395410; doi:10.3390/ijms22168676)
Supplement: Supplementary file 1 [file ijms-22-08676-s001.zip › ijms-1313708-supplementary.pdf]

## Supporting Information

# Functionalization of Human Serum Albumin by Tyrosine Click

**Satsuki Obara,<sup>a‡</sup> Keita Nakane,<sup>a‡</sup> Chizu Fujimura,<sup>a</sup> Shusuke Tomoshige,<sup>a</sup>  
Minoru Ishikawa,<sup>a</sup> Shinichi Sato<sup>\*a,b</sup>**

a) Graduate School of Life Sciences, Tohoku University

2-1-1 Katahira, Aoba-ku, Sendai 980-8577, Japan

b) Frontier Research Institute for Interdisciplinary Sciences, Tohoku University

‡These authors contributed equally.

### List of contents

1. Supporting Data

S2–S17

## 1. Supporting Data

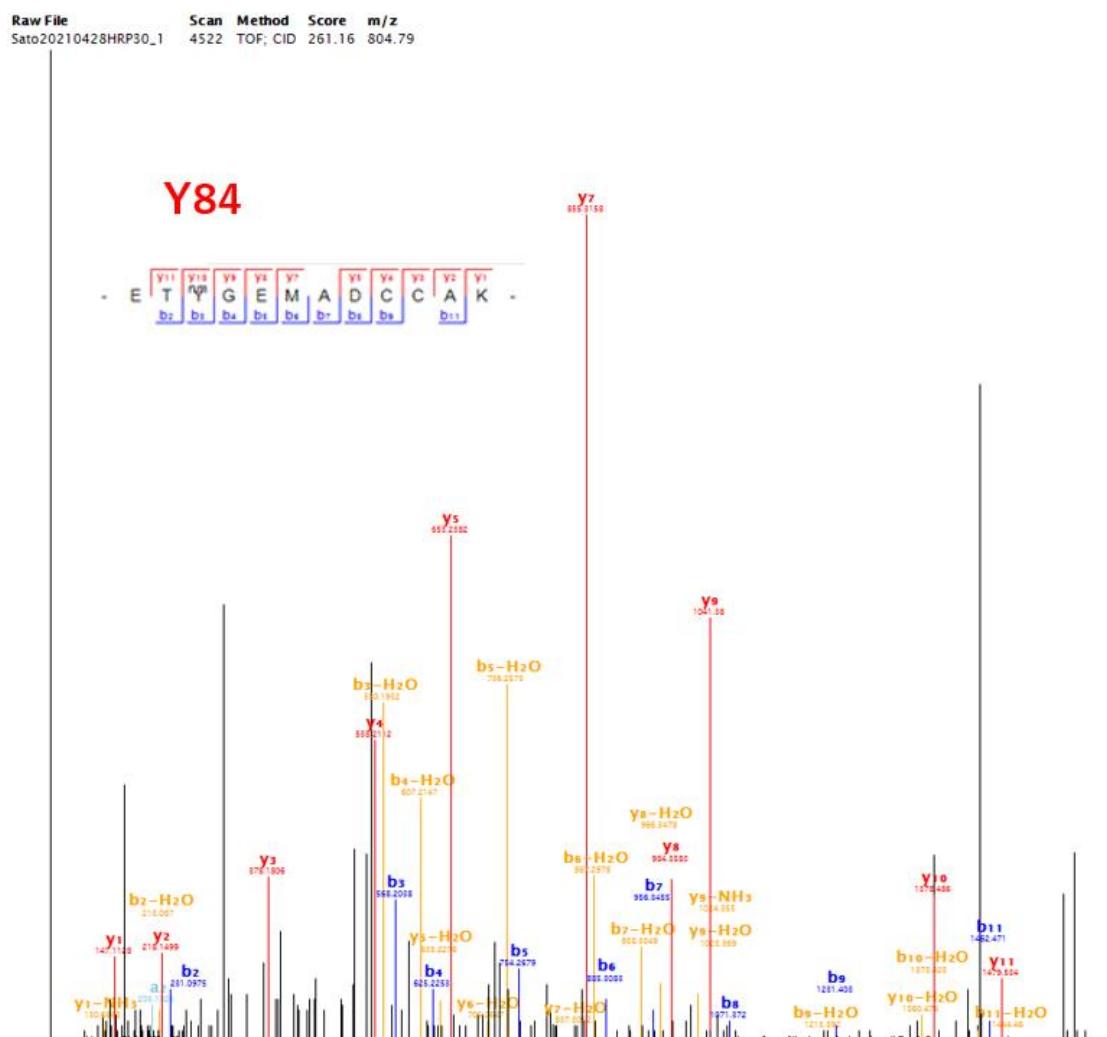

**Figures S1.** MS/MS analysis of the peak containing modified tyrosine shown in Figure 3A.

aw File Scan Method Score m/z  
 3to20210428HRP30\_3 4698 TOF, CID 145.89 891.82

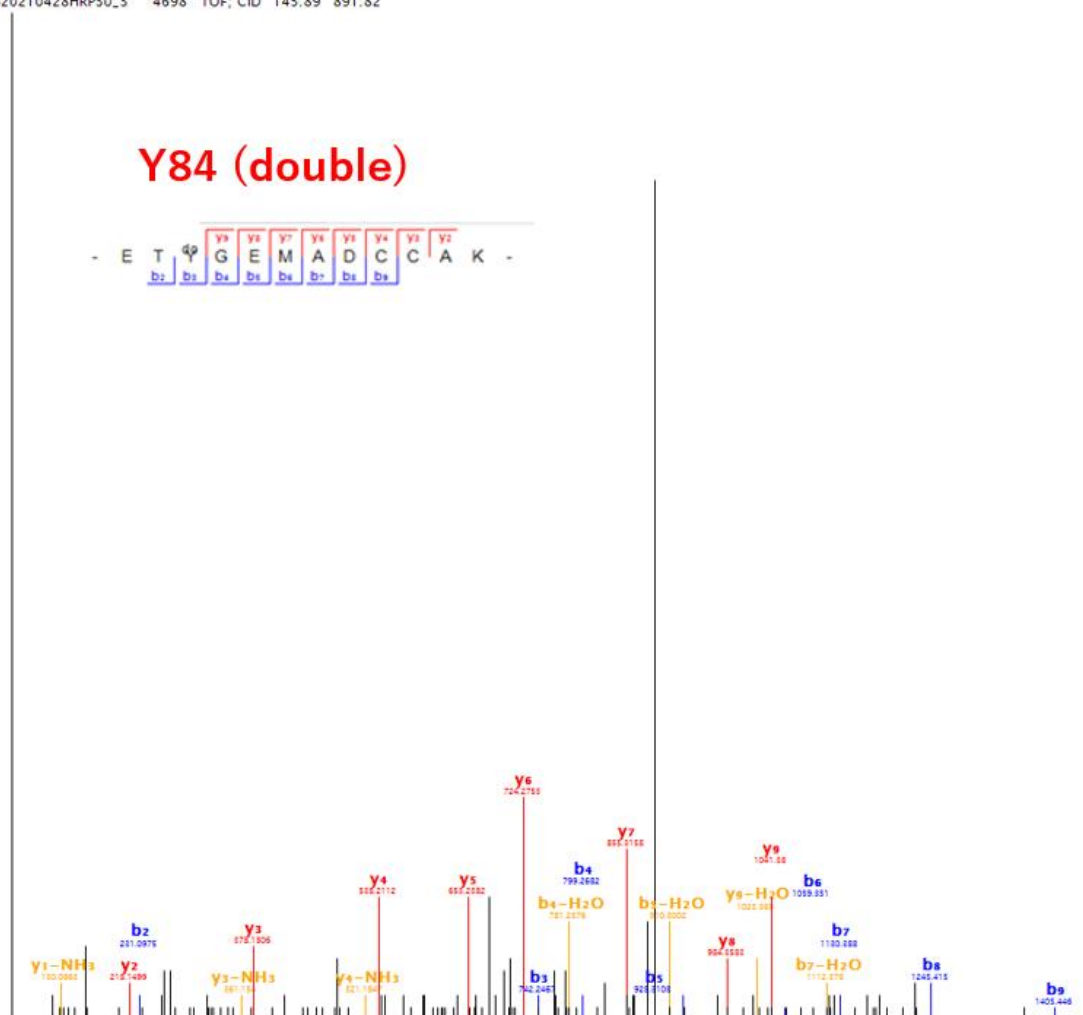

**Figures S2.** MS/MS analysis of the peak containing modified tyrosine shown in Figure 3B.

Raw File Scan Method Score m/z  
 iato20210428HRP30\_1 4739 TOF, CID 231.3 615.32

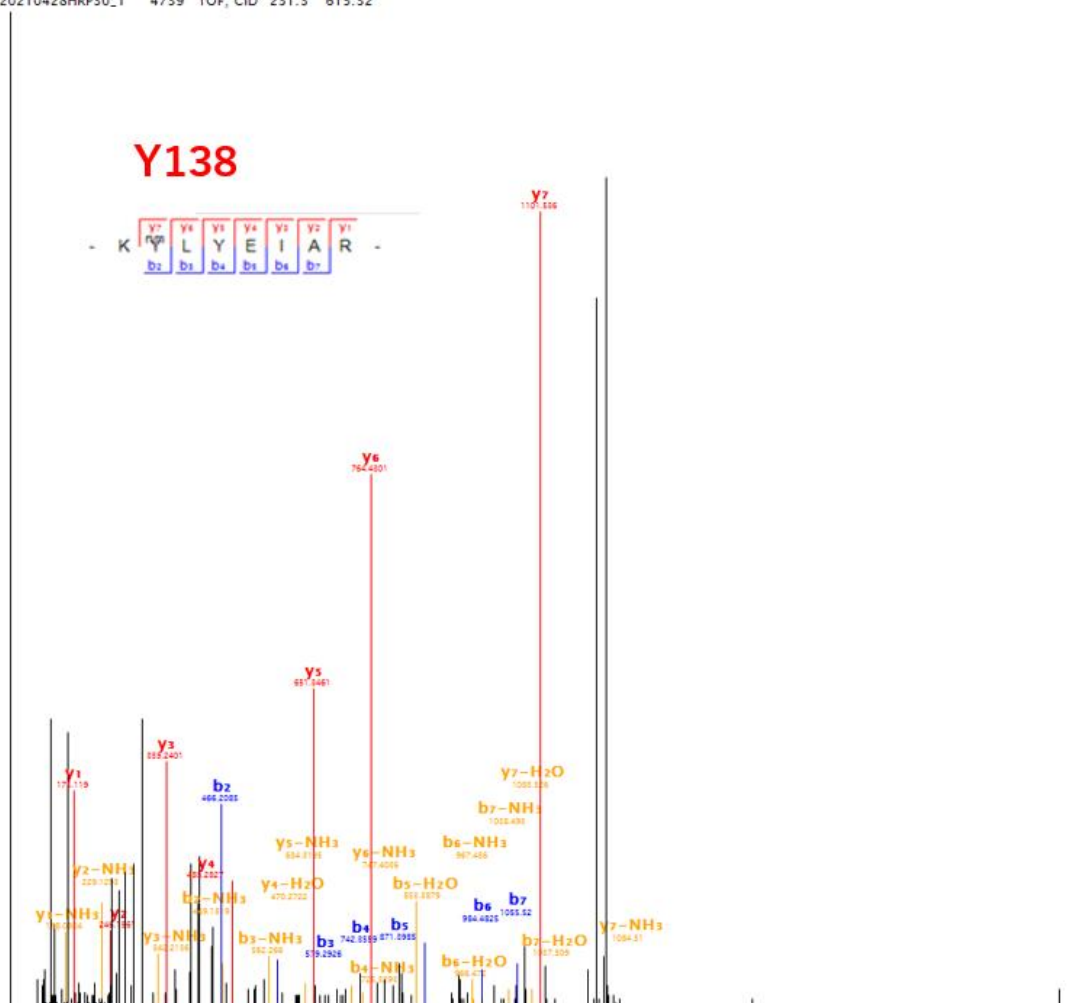

**Figures S3.** MS/MS analysis of the peak containing modified tyrosine shown in Figure 3C.

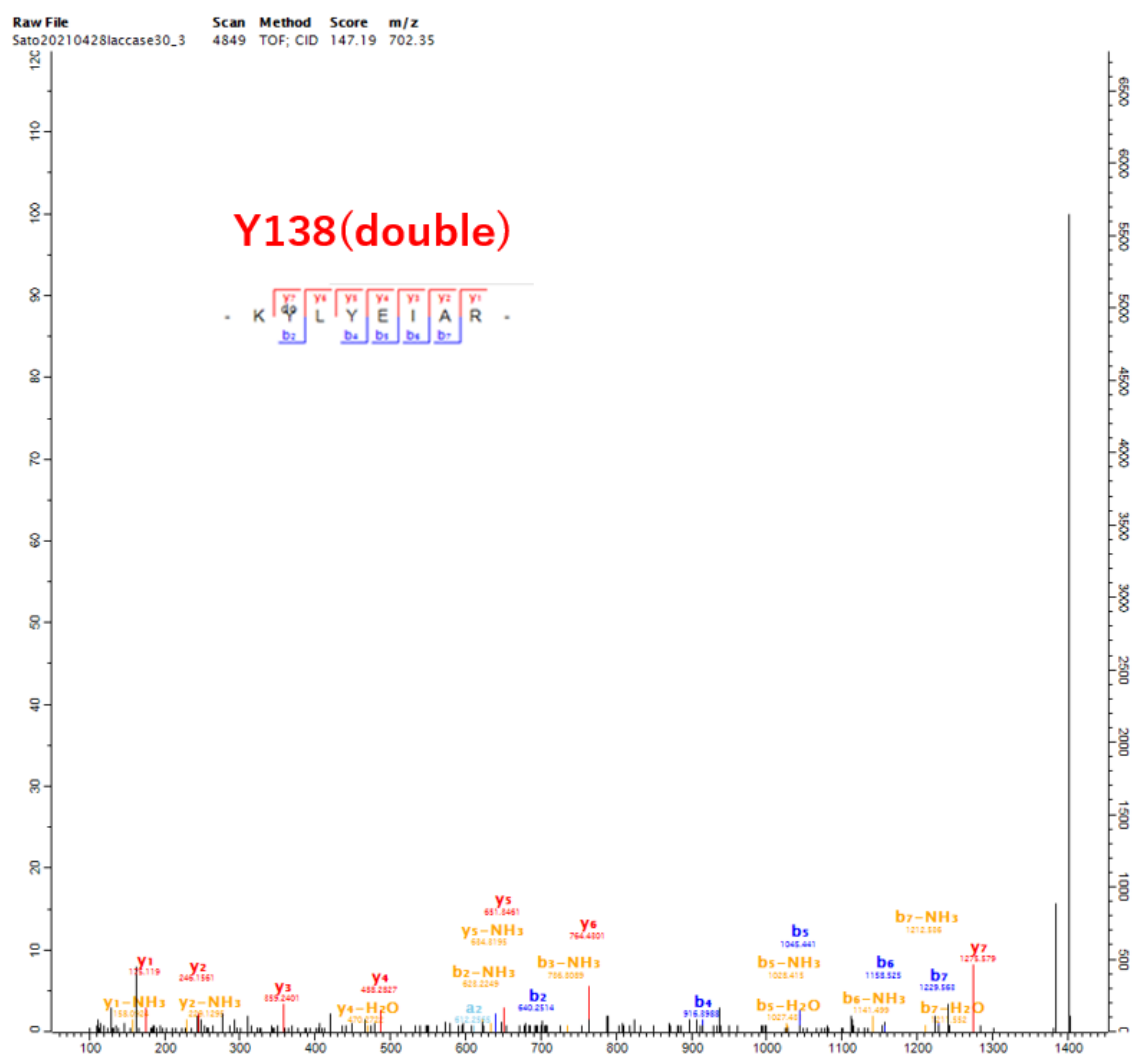

**Figures S4.** MS/MS analysis of the peak containing modified tyrosine shown in Figure 3D.

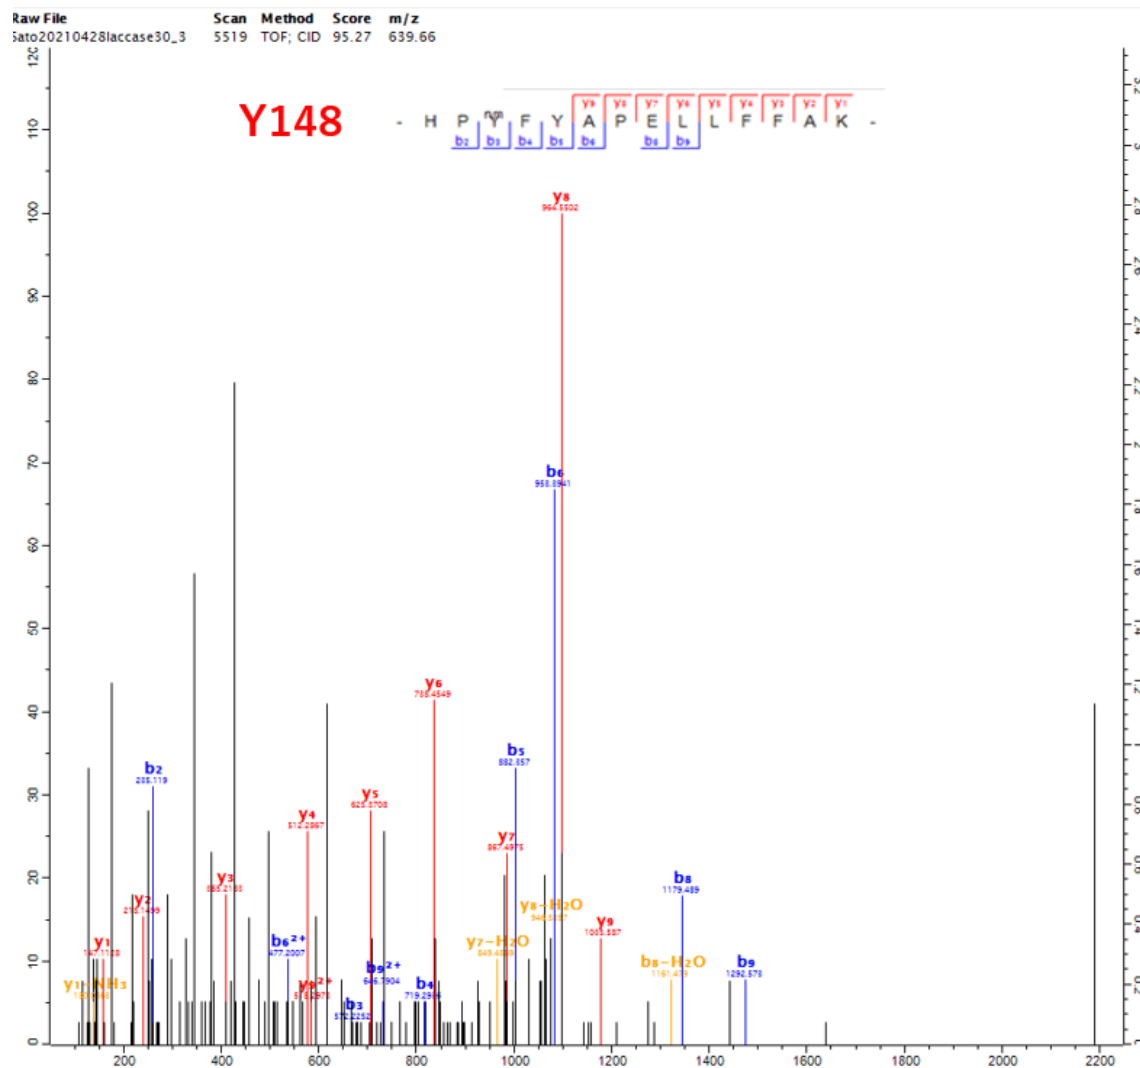

**Figures S5.** MS/MS analysis of the peak containing modified tyrosine shown in Figure 3E.

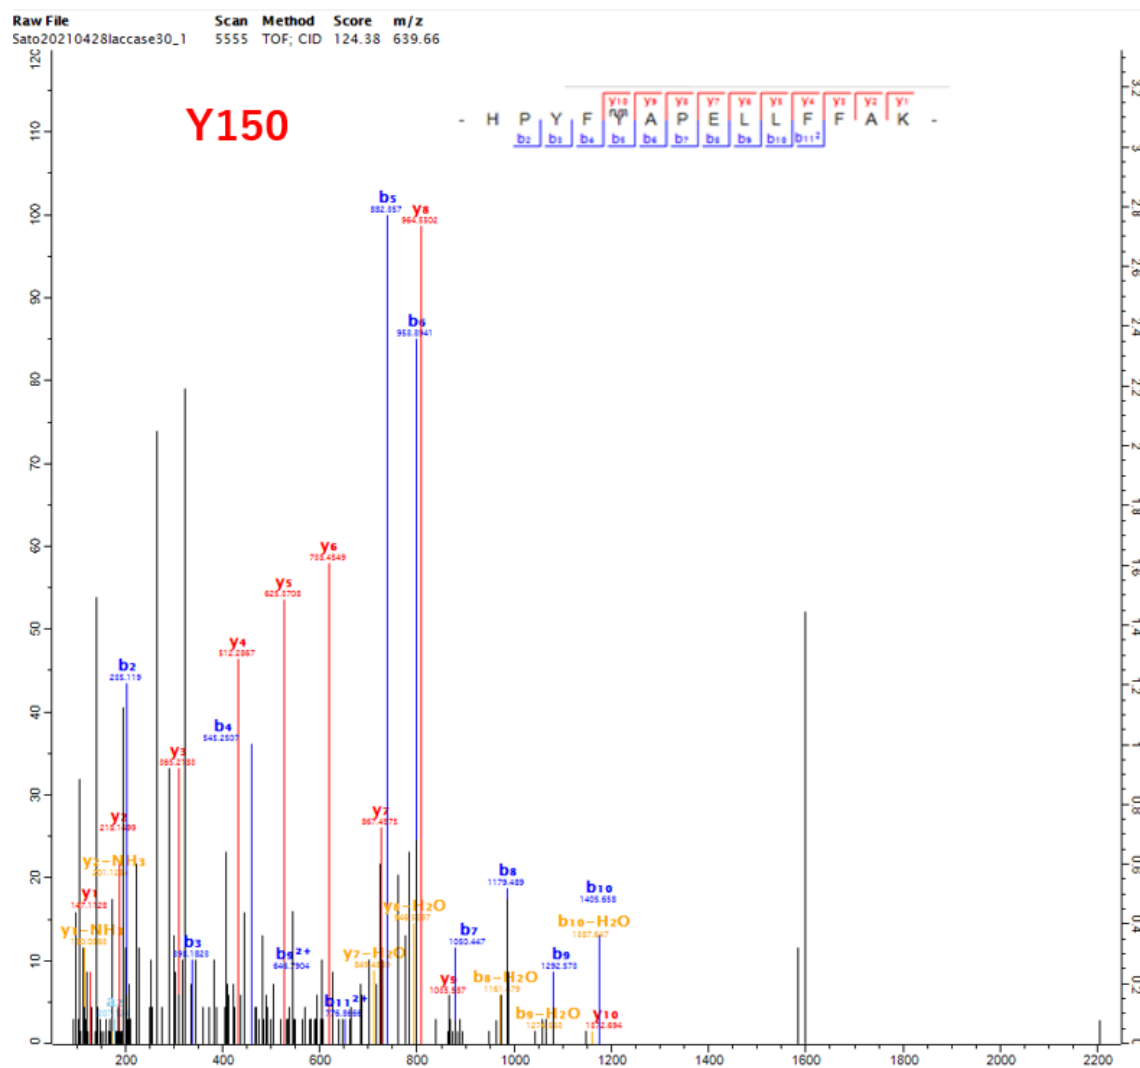

**Figures S6.** MS/MS analysis of the peak containing modified tyrosine shown in Figure 3E.

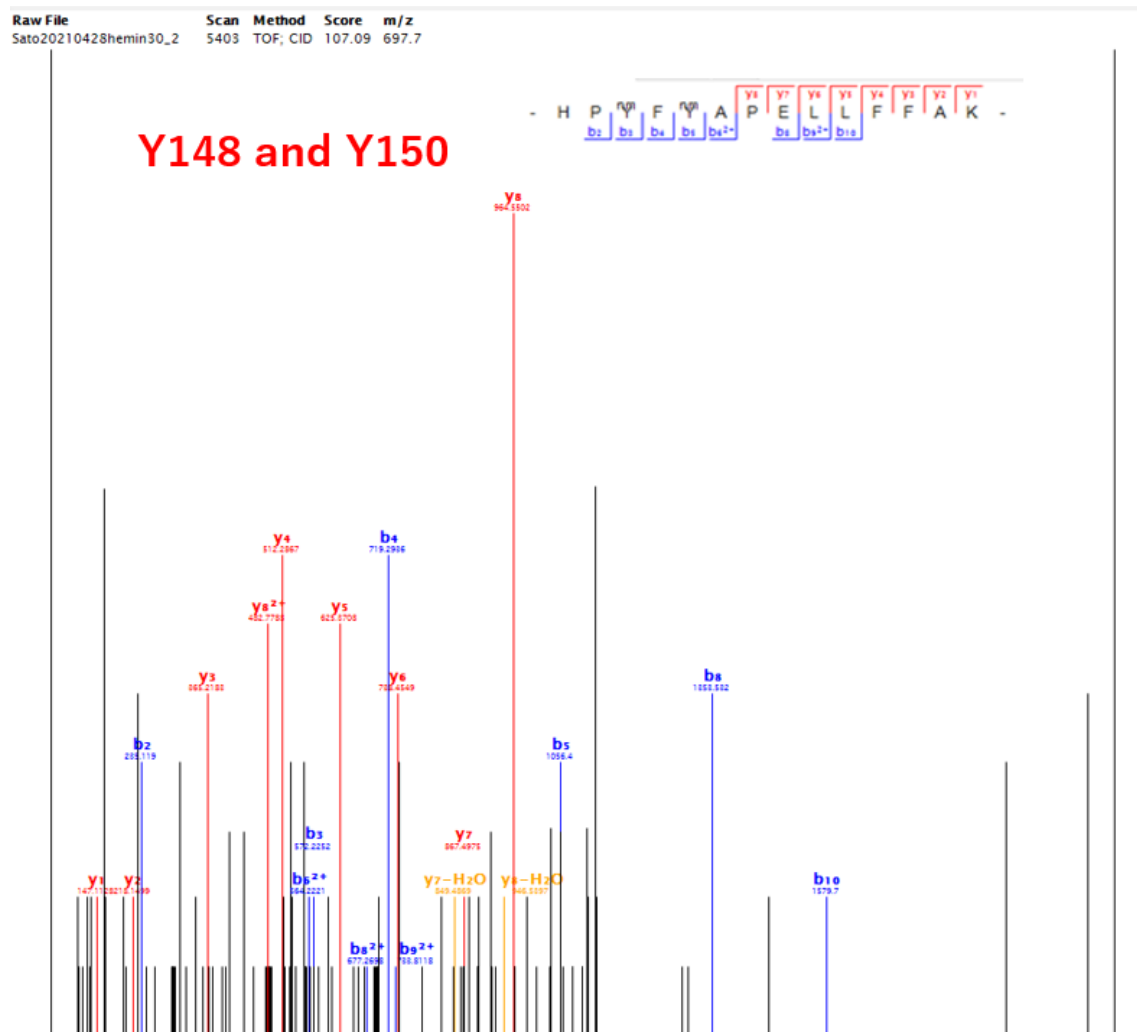

**Figures S7.** MS/MS analysis of the peak containing modified tyrosine shown in Figure 3F.

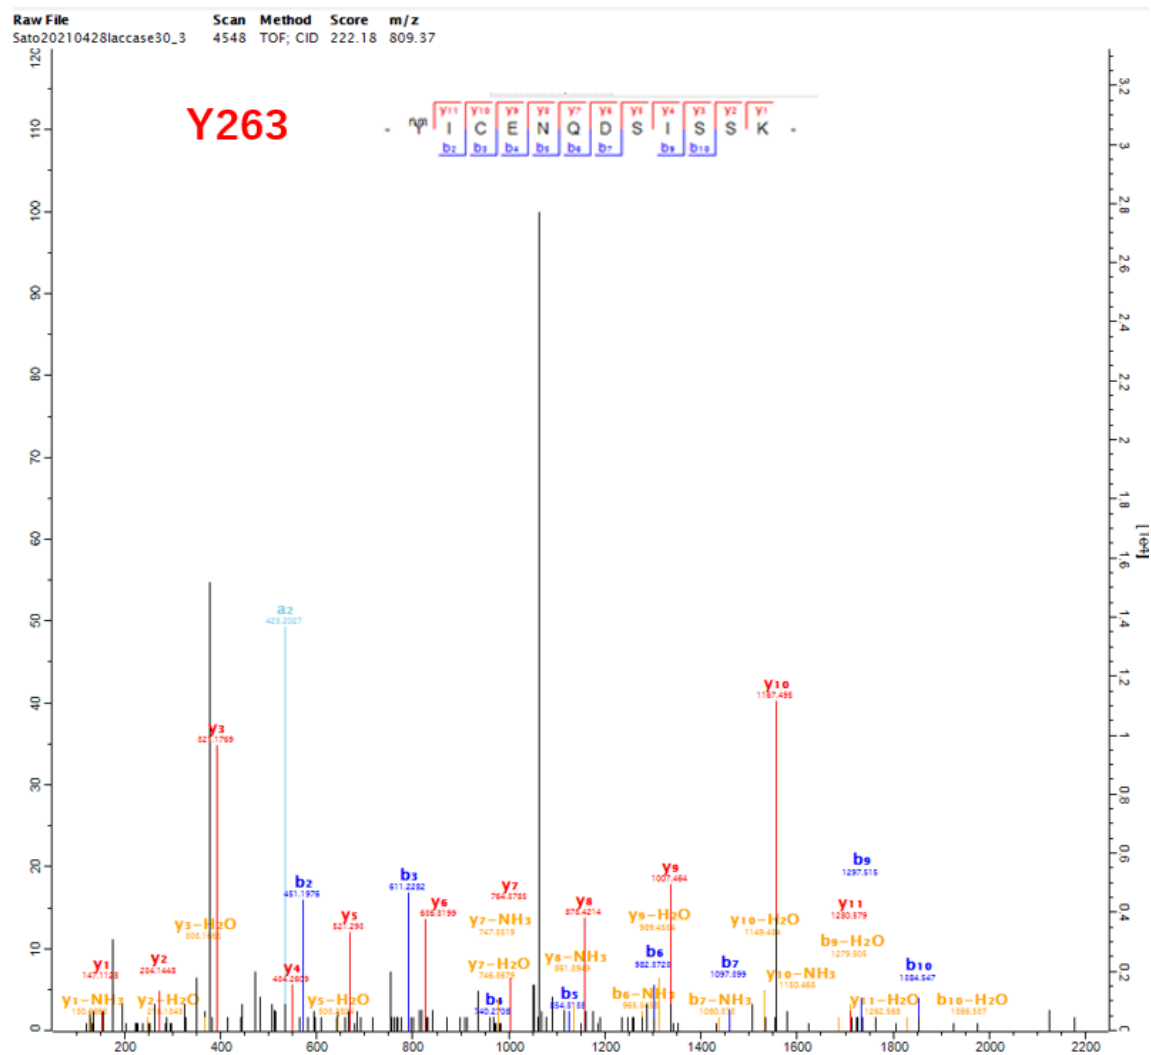

**Figures S8.** MS/MS analysis of the peak containing modified tyrosine shown in Figure 3G.

Raw File Scan Method Score m/z  
 Sato20210428hemin30\_2 5652 TOF; CID 117.92 599.96

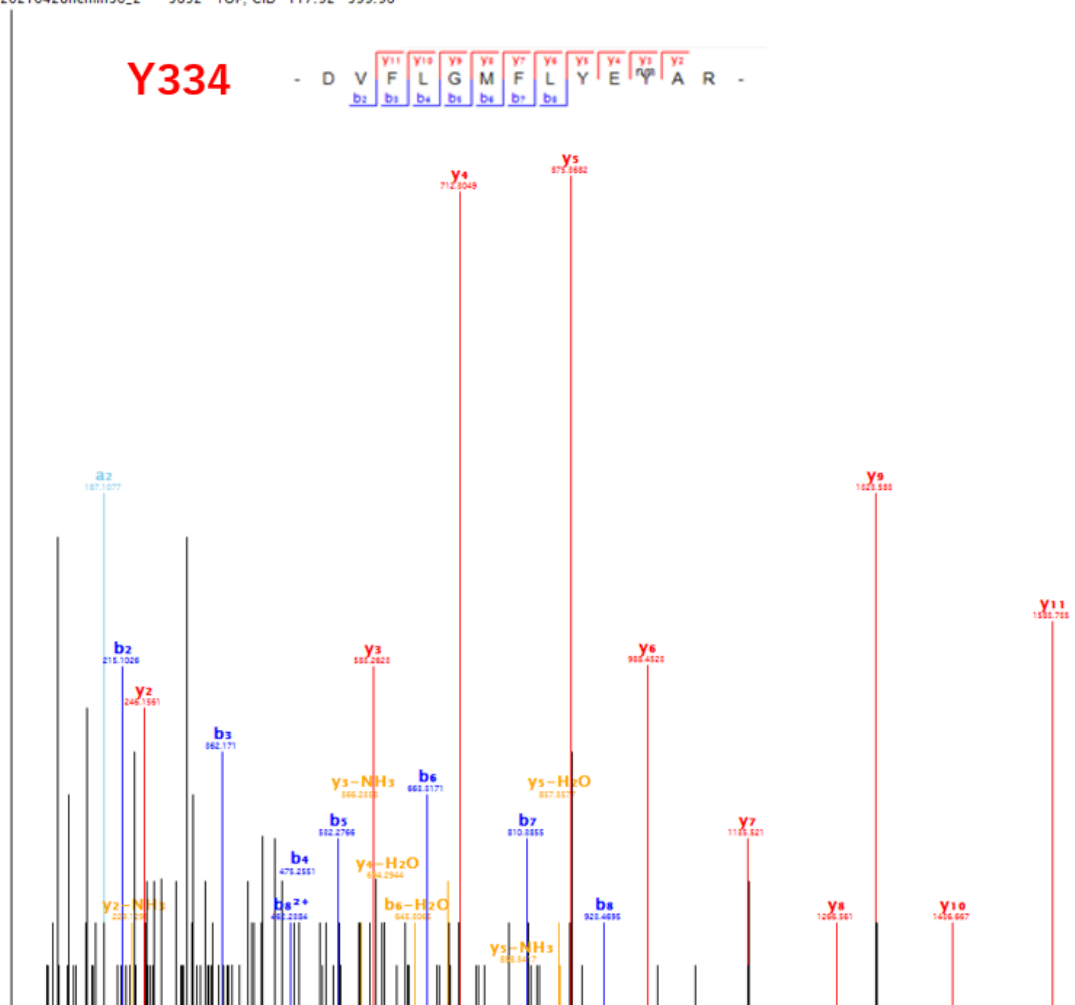

**Figures S9.** MS/MS analysis of the peak containing modified tyrosine shown in Figure 3H.

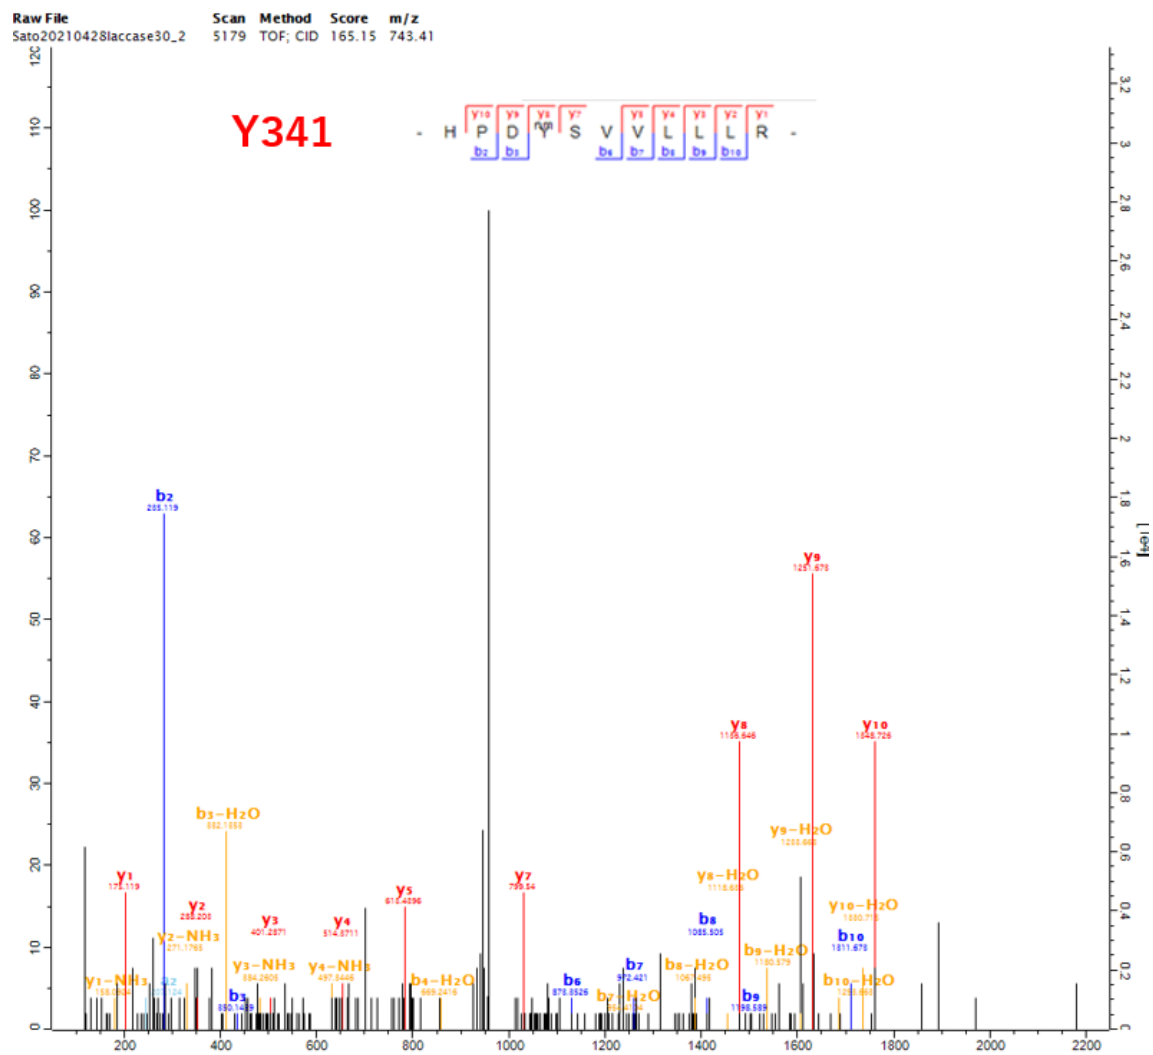

**Figures S10.** MS/MS analysis of the peak containing modified tyrosine shown in Figure 3I.

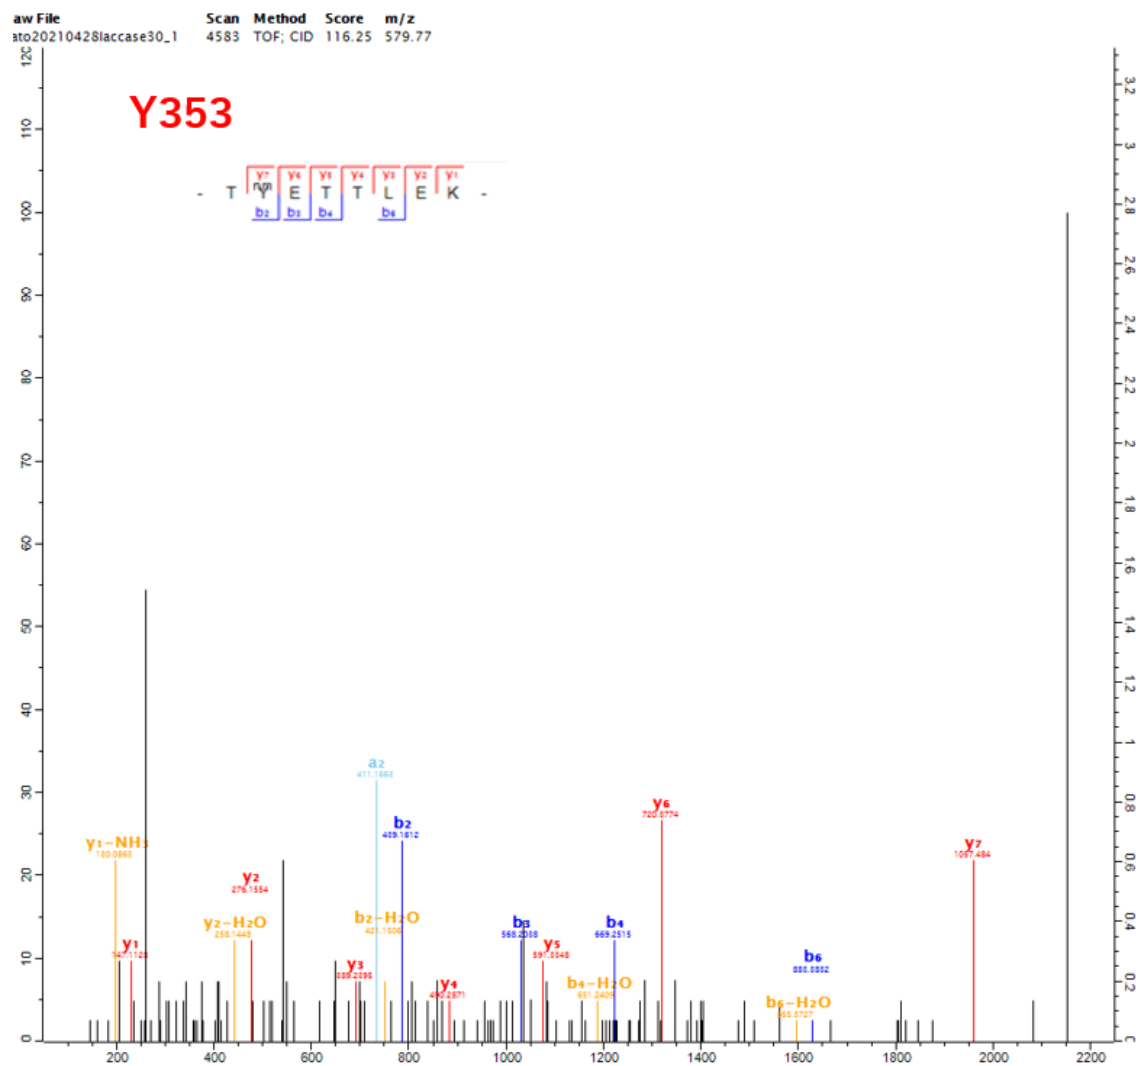

**Figures S11.** MS/MS analysis of the peak containing modified tyrosine shown in Figure 3J.

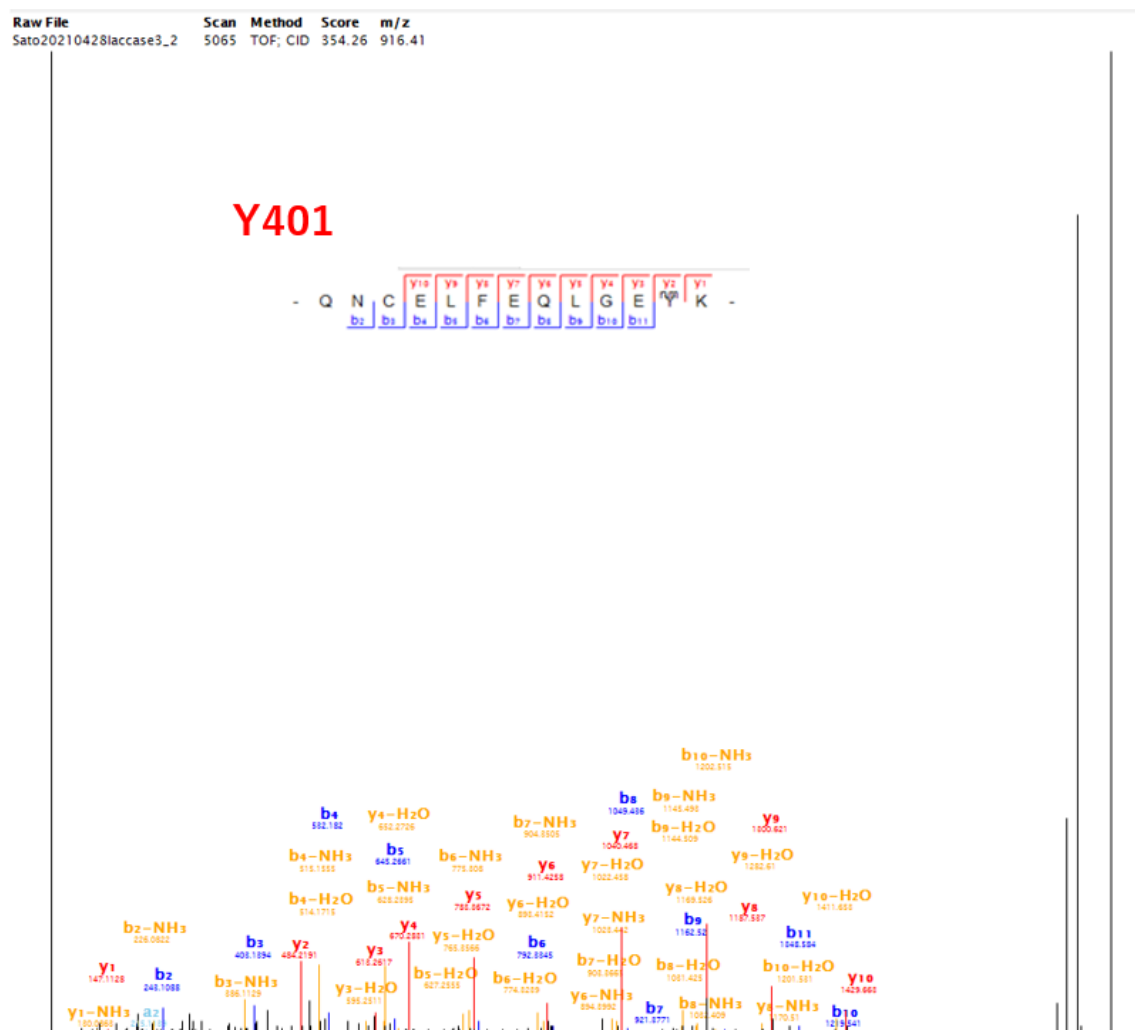

**Figures S12.** MS/MS analysis of the peak containing modified tyrosine shown in Figure 3K.

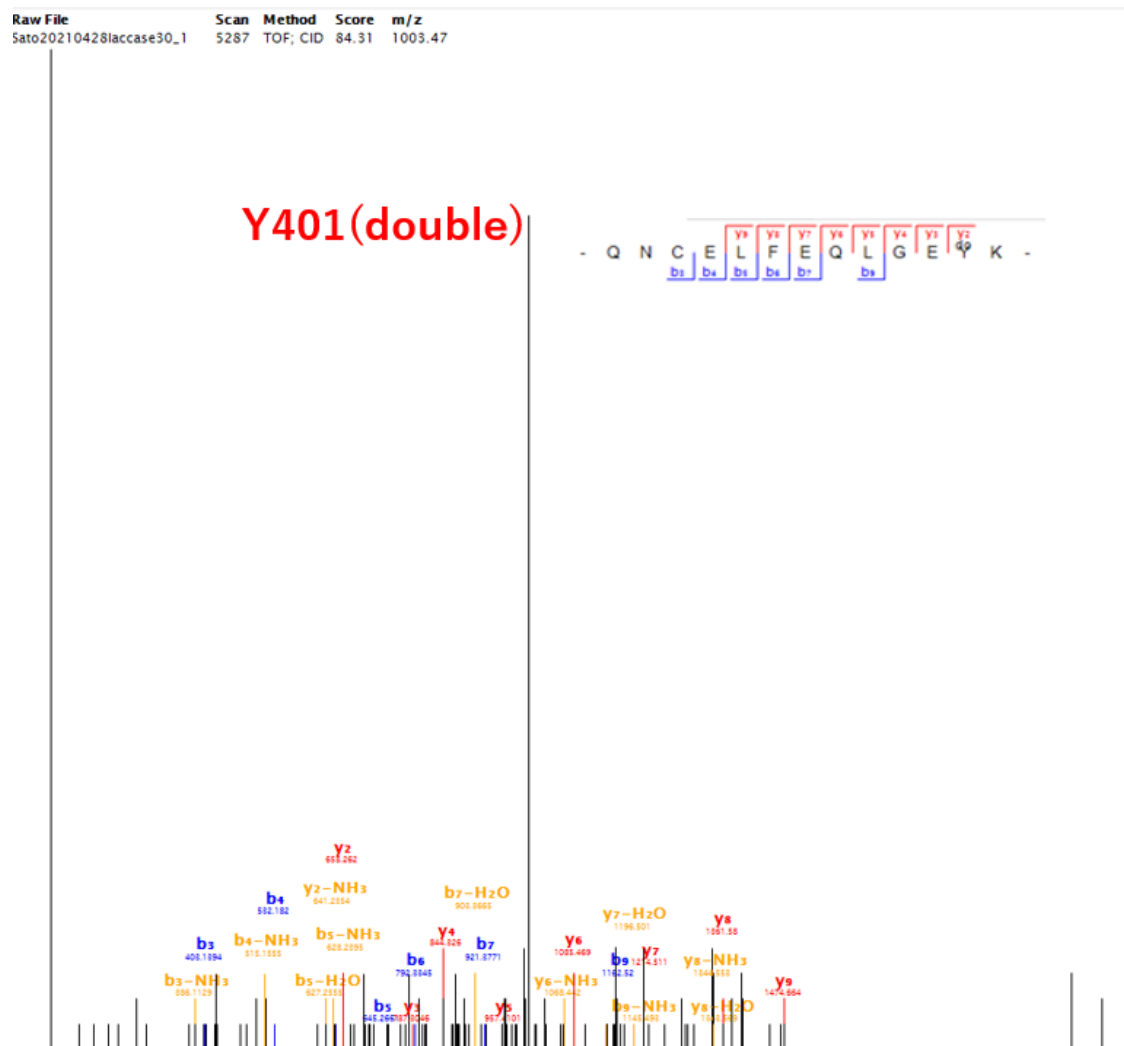

**Figures S13.** MS/MS analysis of the peak containing modified tyrosine shown in Figure 3L.

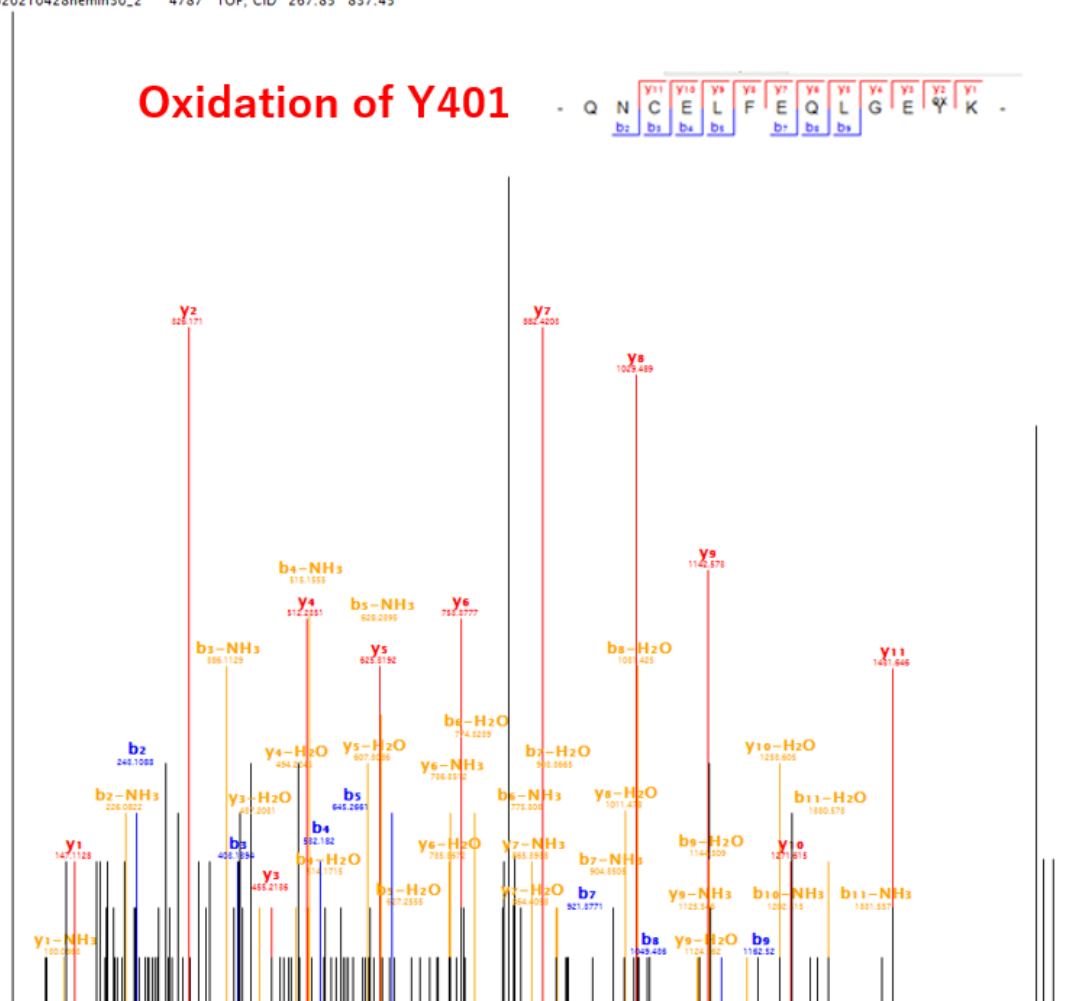

**Figures S14.** MS/MS analysis of the peak containing oxidized tyrosine shown in Figure 4.

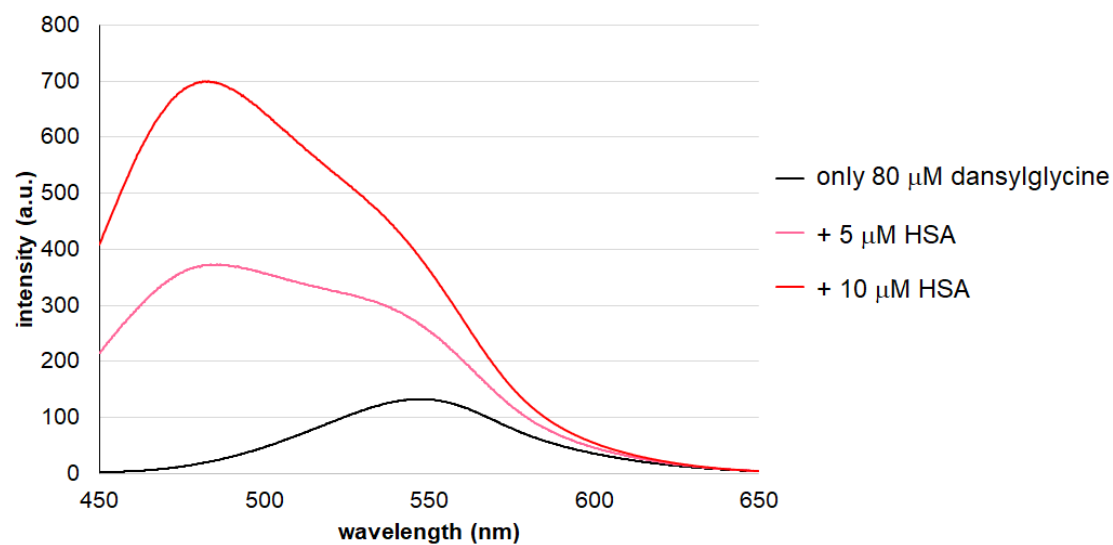

**Figures S15.** Change in fluorescence spectrum of dansylglycine by binding with HSA. Ex: 360 nm. Fluorescent spectrum was measured with FP-6500 (JASCO). 80  $\mu$ M dansylglycine (from 100 mM DMSO stock), 5 or 10  $\mu$ M HSA in 100 mM PBS (pH7.4), 25°C.

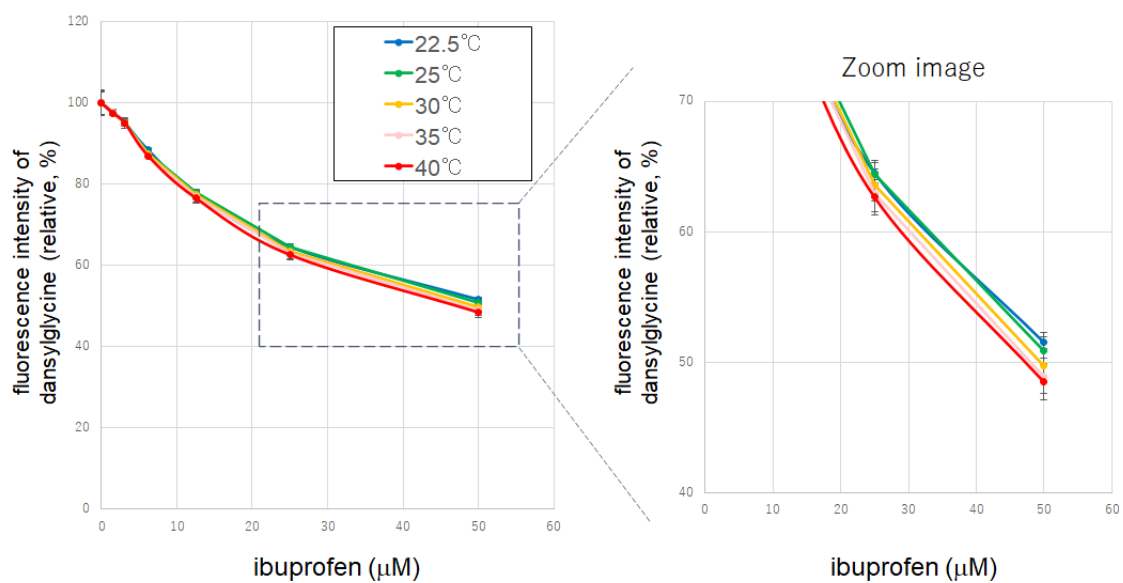

**Figures S16.** Temperature-dependency of the binding competition between ibuprofen and dansylglycine, Fluorescence changes due to competition between ibuprofen and dansylglycine. Error bars, mean  $\pm$  SD from three independent experiments.
